CORRECTION

# Correction: Total proximal tibial osteotomy and cranial closing wedge ostectomy for treating concomitant medial patellar luxation and cranial cruciate ligament disease in dogs with excessive tibial torsion

**Alefe Luiz Caliani Carrera, Eloy Henrique Pares Curuci, Dayvid Vianêis Farias Lucena, Lucas Vasconcelos Costa, Rodrigo Carvalho de Souza Faustino, Stefânia Carolino Claudino Silva, Luis Gustavo Gosuen Gonçalves Dias, Bruno Watanabe Minto**

The Funding statement for this article is incorrect. The correct Funding statement is as follows: This study was financed in part by the Office for Graduate Programs of São Paulo State University (PROPG/UNESP) through call nº 23/2025.

## Reference

1. Carrera ALC, Curuci EHP, Lucena DVF, Costa LV, Faustino RC de S, Silva SCC, et al. Total proximal tibial osteotomy and cranial closing wedge ostectomy for treating concomitant medial patellar luxation and cranial cruciate ligament disease in dogs with excessive tibial torsion. PLoS One. 2025;20(7):e0327247. <https://doi.org/10.1371/journal.pone.0327247> PMID: [40694590](https://pubmed.ncbi.nlm.nih.gov/40694590/)

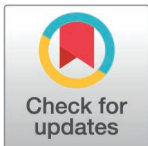

## OPEN ACCESS

**Citation:** Carrera ALC, Curuci EHP, Lucena DVF, Costa LV, Faustino RCdS, Silva SCC, et al. (2025) Correction: Total proximal tibial osteotomy and cranial closing wedge ostectomy for treating concomitant medial patellar luxation and cranial cruciate ligament disease in dogs with excessive tibial torsion. PLoS One 20(10): e0335371. <https://doi.org/10.1371/journal.pone.0335371>

**Published:** October 23, 2025

**Copyright:** © 2025 Carrera et al. This is an open access article distributed under the terms of the [Creative Commons Attribution License](https://creativecommons.org/licenses/by/4.0/), which permits unrestricted use, distribution, and reproduction in any medium, provided the original author and source are credited.
